# Supplementary material for: Inhibiting the endocannabinoid degrading enzymes FAAH and MAGL during zebrafish embryogenesis alters sensorimotor function
Source: Oxford University Press journal article supplement (doi:10.1242/jeb.244146), 2022-04-19
Supplement: jeb244146supp.pdf [file jeb244146supp.pdf]

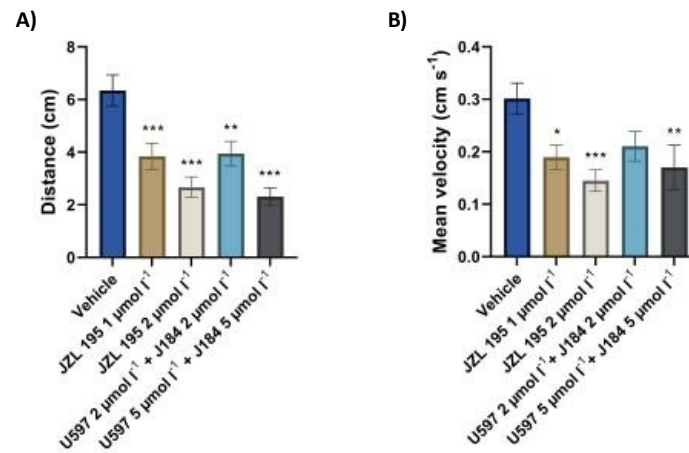

**Fig. S1.** Treatment with both URB 597 and JZL 184 produces similar deficits to 2 dpf escape swimming (**A**) distance and (**B**) mean swimming velocity as JZL 195 does.

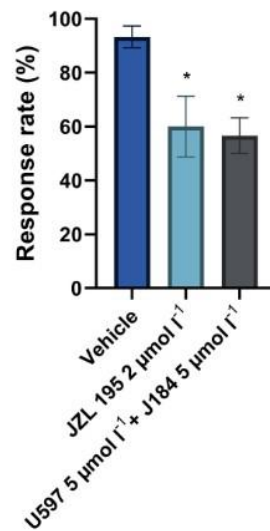

**Fig. S2.** Treatment with both URB 597 and JZL 184 produces similar deficits to 6 dpf A/V responsiveness as JZL 195 does.
